# Supplementary material for: High Cytoplasmic and Membranous Versus Nuclear Talin-1 Expression Associated With Malignancy Potential and Poor Survival in Clear Cell Renal Cell Carcinoma
Source: Research Square preprint supplement (doi:10.21203/rs.3.rs-153865/v1), 2021-02-04
Supplement: Supplementary file 1 [file c64f830ea7f219b2904e8a18.xlsx]

## Sheet: legends
Sheets	Differentially expressed genes (DEGs). Cancer /Normal	PMIDs
Sheet 1	Clear cell renal cell carcinomas	PMID: 30838877	PXD011681
Sheet 2	Papillary renal cell carcinomas	PMID: 31484429	PXD013523
Sheet 3	Chromophobe renal cell carcinomas	PMID: 32694149	PXD019123
Sheet 4	Common genes ,hub genes, and candidated genes

## Sheet: Sheet1
Gene names
SLC16A3
MT1H
MT1F
HMHA1
ACAN
PLIN2
PRODH2
RHCE
MT1G
DOCK2
GATM
OAS2
FMO5
ALDH6A1
ABAT
PSMG3
UMOD
PLOD2
CTHRC1
CHCHD4
PTH1R
SLCO4C1
FABP1
SLC5A9
SLC13A2
ALDOB
SIGLEC1
MT-ND3
AGMAT
ECHDC2
FBXO2
SFXN2
SLC5A12
SLC5A2
ASS1
IKBIP
ALDH4A1
FBP1
PCK2
SLC2A1
CYP4F3
MT-ND4
GPNMB
ABCC6
LETMD1
SLC6A19
PIPOX
CD276
ARHGEF2
ASPDH
ACSM2B
ASB9
TAP2
REEP6
CA9
SLC23A1
ECHS1
RNASE6
ABCC2
ACAT1
HSD11B2
NDUFA12
L1CAM
NDUFS4
SFXN5
NDUFA4
COL1A2
ADH6
TFB2M
GLYAT
NDUFB9
CALML3
HSD3B7
NDUFB8
HLA-F
SIGLEC10
CGN
ACADSB
PKN1
NUDT8
RNASE2
UGT2B7
IGUNKNOWN
CHDH
CASR
LDHD
CENPB
NDUFS7
PALD1
OTUD6B
NDUFA7
FXYD2
NDUFB3
PRKCDBP
COL2A1
ITIH1
HOGA1
ALKBH7
MNDA
IGFBP3
GLYATL1
ITPR3
ACAA1
GGACT
PSMB10
TYMP
MT-ATP6
MZB1
AASS
ACY1
EPB42
SIRPA
AIF1L
SLC12A1
NDUFB6
CADM4
NAPSA
LDHA
MCAM
ATP1A1
PAPLN
SLC36A2
TINAG
ALDH2
MYO1G
HSD17B8
ATP1B1
TGFBI
ACADM
UQCRH
TG
HCLS1
MT-ND5
LAMA4
ISG15
NDUFB11
MUT
HADH
BSND
RDH12
SNRNP40
MSRA
ILKAP
STAB1
ITIH3
GPLD1
FMO1
GPX3
NDUFA4L2
PHYH
DHRS4
GK
TST
ABI3BP
LGALS9
VCAN
P4HA2
DMGDH
SLC7A8
TAP1
FBLN5
EPHX2
NDUFA11
NDUFS2
MFGE8
VWF
FLNC
CALB1
NDUFA2
TBXAS1
CD36
MISP
KRT80
SEC11C
PLCL1
HIBCH
OGDHL
DUSP9
SLC22A7
HPD
PHYHD1
ANKRD13A
TTC39B
MCCC1
LTBP2
COX6B1
PRTN3
SUCLG2
MT-ND2
NNMT
ACSM3
ADH1B
LYZ
HSPB8
ACMSD
TLR3
CPNE8
LIPA
NPHS2
COX6C
NDUFA9
FBXO17
EPB41L5
ANPEP
ITGAM
P3H1
EHD2
ADH1C
EEF1E1
DARS2
GUCY1B3
SLC22A8
TGM2
MRPL9
FASTKD5
MGAM
COX7A2L
COL21A1
ERGIC3
SLC16A7
MRPS30
HTRA1
CDH13
CMBL
GLRX5
PLOD1
AUH
MTCH2
HRSP12
COQ9
SDHA
FABP7
ARSB
SLC22A11
ANKS4B
HSPD1
FMOD
COQ6
PXDN
HIGD1A
NUDT3
ECSIT
PPID
PBLD
UQCRFS1
MAP7D1
FLT1
POSTN
ETFA
BPHL
GCAT
AFMID
LAMC1
GSTZ1
CD70
CA4
PEBP1
ACSF3
MCM6
KLC4
UQCC1
OXCT1
HDHD3
ENTPD1
PSMB9
GLUD1
ETFB
C1orf198
AFAP1L2
FN1
NDUFA5
PECR
OXSM
STARD10
NDUFAF4
GHITM
SLC4A4
TLN1
HMGCL
PML
TACSTD2
COL5A2
FAM151A
CYP4F2
IL16
DLD
S100A1
NDUFA6
ATP5B
PTRF
COQ3
ACOT13
RPA2
COX11
MX1
DECR2
RQCD1
SLC25A5
ASPSCR1
ANGPTL2
HLA-DQB1
GIMAP4
COA6
ITIH2
ECI2
SARDH
NDUFB4
GCDH
ARHGAP4
DCXR
SUGCT
PTPRC
RRP12
STBD1
STK4
ANK1
ANXA4
FRAS1
MRPL44
BCKDHB
VAMP8
TRIM2
CSTF3
PLOD3
FH
FOLR2
SLC25A10
AIFM1
HMGCS2
AGXT
CYBB
PPP1R13L
MRPL34
SLC22A13
ZC3HAV1L
NDUFS5
CTSG
HBD
OAS3
FHIT
ACSM2A
GPR89A
CBR4
C8orf82
ABCB1
CPNE6
ACOX1
OGN
LCP1
COL1A1
PDIA5
HIST1H1B
SLC25A4
DCTPP1
AOX1
IGKLENaa
CSTB
COX4I1
GGH
NPR3
CYCS
ACAD10
HLA-DQA1
PCCA
NDUFS6
AMN
APOBR
LRP2
SLC5A10
XPOT
NDUFB5
CORO1A
PLEK
OAS1
FMO4
APOC3
RIC8A
NDUFV2
RABEP1
ITGB2
GPRIN1
CDK18
GOT2
CDH16
ACE
GPRC5C
SP100
HLA-DRB4
GLUD2
COL4A3
ACOT11
TUBB6
MMP14
LMNB1
SUOX
EGFR
IVD
HIF1AN
NDUFB10
GGT1
CLYBL
CTSC
DECR1
CYC1
OMA1
AKR7A3
MRPL40
QDPR
MFAP4
HLA-A
PCK1
COL6A1
THNSL1
FBXO21
CRYL1
RAP2B
RDH14
HINT2
NAT8
LRPPRC
S100A4
APOC1
FGB
DDC
SORD
WIPF1
DBT
MCEE
SLC4A1
EVA1B
C3
ALOX5
ACAA2
FBLN2
MGAT1
LGALS3
THBS2
CLASP2
ICAM1
CD63
PACSIN3
EHHADH
MPC2
CAV1
LTBP4
PLLP
C16orf13
COL6A3
TMEM173
FGD4
ECI1
AK4
PGM2L1
COL4A6
LANCL1
PRDX3
NIPSNAP1
NDUFA8
MCCC2
SQSTM1
UQCRC2
GIT1
MRPL39
ACO1
GNG10
CPNE1
ATP5O
ENPP3
COL6A2
C1QC
SLC22A6
IMMT
ALDH1L1
TKFC
ECHDC3
ATP6V1B2
PALM
FGA
BCKDHA
CLMN
DPEP1
DAO
PLEKHA7
RAB11FIP3
AEBP1
SMTN
SHMT1
OCIAD2
GCHFR
EBNA1BP2
TXNRD2
FASTKD2
BDH2
ICAM2
CA1
TFB1M
C14orf159
ATP6V1B1
ATP5A1
TMX3
SLC25A42
SFRP1
ANXA1
EMILIN2
MRPS18A
AGPAT3
LUM
PAH
HAO2
LGALS1
NNT
SEL1L
MVK
NDUFS1
ETFDH
ITGB4
CTSH
YWHAH
RBP4
NDUFA3
SLC25A6
FOXRED1
NOL3
PTCD3
DHODH
PHKB
MRPL10
STOM
FOLR1
PEX11G
PTPMT1
TXN2
TMEM192
HBB
NDUFS8
ATP6V1A
FBXL8
IMPDH2
OSBPL8
COA4
NPC2
COL4A1
HIBADH
SDHC
COA3
GLB1
PDP1
DLAT
CD5L
ELMO1
TSNAX
ISCA2
IGLC7
IGFALS
FAM129A
HBA1
DSG1
AHNAK2
SLC25A11
PFKFB2
ALDH7A1
GLS
EFEMP1
GYS1
PCCB
MT-CO2
TRADD
ACOT2
EPB41L1
ERO1A
ATP5L
SLC25A3
COPS4
CD14
ATP5H
CLEC14A
DNAJC11
HLA-B-
ADIPOQ
LAD1
RDH11
SDC1
MACROD1
SERPINH1
OSBPL10
CEACAM1
DYNLL2
IFIT5
IFI35
SIRT3
NDUFA13
VWA1
ACAD8
MDH2
RAB32
PES1
SDR39U1
MRRF
RCN3
BDH1
DPP9
SUCLG1
CKB
IGKNG9aa
AKR1B1
ISCU
SPTA1
RASIP1
PDHB
AK2
C21orf33
MRPL46
ARMCX2
MRPL19
TPCN1
EXOC4
FECH
MT-CO1
GBP1
HADHB
MRPL49
GPAT3
SLC22A12
SCRN1
NMNAT3
MRPL23
GMFG
ATP6V1G1
PDGFRB
CD74
MAMDC2
MYOF
CNP
MYADM
C11orf54
CRYZ
UQCRC1
CYGB
PFKP
PLS3
MRPL14
HMOX1
BGN
CMA1
ACLY
SPARC
TAMM41
XRCC5
PLEC
PECAM1
WARS2
VIM
RNF213
TFRC
COLGALT1
NDUFA10
ATP5J
NCKAP1
HLA-B
GSTM3
PTGDS
ALDH3A2
CNRIP1
FAHD2A
LETM1
CYB5A
SLC9A3R1
COL3A1
UGT1A6
APOL2
RBP5
DPCD
DYSF
ADCK3
TFAM
SPTB
PDXDC1
HK2
SERPINF2
LNP
TNFAIP2
MRPL48
PNKD
EVL
HGD
MRPS2
NUBPL
VWA8
ATP5I
ATM
CGNL1
MRPS10
AARS2
TM9SF2
ALDH1A2
NFKB1
MTX3
NDUFB7
AKR1A1
XPO1
DSP
ATP5J2
PDHX
SYK
NID1
BCAM
APRT
AQP1
MTX2
UBA6
DCAKD
SUCLA2
SNX3
PHGDH
ANXA2
TAPBP
ECH1
C1QBP
SERPINA5
ARHGDIB
PADI2
RECQL
DPYS
NUDCD3
MRPL55
PMPCA
HAAO
CISD1
UQCRQ
HLA-A--
SLC25A13
PLD3
MRPL12
GFM1
MFN1
EPCAM
MVP
OGDH
MPST
DDX21
ABHD10
LUC7L2
ADAR
CHP1
AGPAT5
HAPLN1
ACTR1A
NRIP2
ME3
NADSYN1
MRPL37
ATP5F1
FUBP1
MRPL21
CP
ERAP2
ALDH8A1
ILVBL
BTN3A3
FHL1
SNRPD3
XPNPEP3
RBM12
ATP6V1E1
HRG
XPNPEP2
IDH3B
FN3K
STAT6
LRRC47
SERPINA1
DERL1
LSP1
STAT1
KRT5
THRAP3
CPQ
XPC
TNS3
LDHB
KMO
CASP1
KCNAB2
MGLL
HBG2
NOP2
AMT
KIF2A
LACTB2
TBC1D4
ARHGAP25
HACD3
GALM
S100A11
ESPN
FAM129B
SGPL1
AFM
ATP6V1D
INF2
DNAJA2
PNPLA6
CCDC58
NEBL
ALDOC
MYDGF
EFHD2
NDRG1
PNPT1
MFAP5
SAMM50
MRPL2
CARKD
SDHB
LCLAT1
BAP18
FAF2
ACSL1
PDZK1IP1
TOR1AIP1
ESAM
ATP5D
USMG5
PCNP
DHRS7B
GCSH
AGO3
SEPT8
MRPS22
MTHFS
L3HYPDH
FABP4
HLA-A-
MRPS23
IPO9
NTPCR
WBSCR16
ECHDC1
TAGLN2
PDLIM1
SEPHS2
MRPL16
UGT2B10
STAT2
TACO1
MRPS36
SERPINB9
SAMHD1
MRPL1
SERPINA3
IGKVGaa
SH3GL1
MMAA
FABP5
GFPT1
RPL4
FDX1
CHCHD5
SIRT5
CLCN5
ACBD5
MYL9
SCPEP1
SARS2
LSM8
CORO7
COX7A2
AIP
ACSS1
EXOC3L2
PITPNB
PURB
VAMP5
HLA-DRA
MRPL4
CYB5R1
CDH1
HNRNPM
APCS
ITGA5
CCDC51
MRPS28
PYCARD
ALDOA
TMLHE
ACADS
PODXL
SMIM24
EIF3E
CAD
ENOSF1
MYBBP1A
COX5B
MMRN2
TPP2
MECR
ADAM10
AKR7A2
MRPL11
PDK2
RAB11FIP5
ETHE1
ADSS
HSD17B10
ITGA7
PC
FKBP1A
PRDX4
ACO2
VASP
SLC25A20
PPP4R1
NCEH1
KDELC2
NUBP1
HLA-DRB1
MGST3
C8A
HSPA2
PIGT
SPTAN1
NDUFAB1
TSFM
ATP5C1
GALNT11
ASPA
NUDT6
IGLHAaa
C8B
COMMD4
MRPS35
SF3B2
SLC22A18
HPCAL1
NQO1
TBC1D10A
CD109
CKMT1A
LONP2
THSD4
EFNB1
GNS
LAMB2
STX3
OSBP
MRPS18B
CYP27A1
F2
MRPS5
S100A16
MAP1B
MRPL38
HKDC1
BIN1
TMEM256
BPGM
ADHFE1
PHYKPL
IGHTILaa
SNX27
PPP1R21
RBM14
SPATS2L
AGXT2
ITGA3
MRPL45
CAPZB
RSL1D1
MRPS27
IYD
DSG2
IFIT3
COPB1
HLA-DPA1
COMTD1
CAP2
SLC27A2
PLEKHO2
PHKA2
ASPH
IGHG1
CD163
VIL1
SSH3
PTGS1
KIF5B
C7orf50
FAM49B
HSPE1
CARS
PLIN3
SYNCRIP
SLC44A1
MRPS9
RPLP1
CALU
PDHA1
SF3B4
TRMT10C
PLVAP
STK3
IFI16
ENO2
COPG2
EML1
CPT1A
IGHG3
NID2
VAC14
IRGQ
RAP1GAP
ENTPD5
PFKL
SH3GLB1
ECM1
INADL
CS
C6orf203
GLRX
PKM
AIF1
SMARCA2
SEPT9
NOMO2
ITIH4
SMAP2
GPD1L
SH3BGRL3
IARS2
ATP6V1F
GBE1
AP1S1
TEX264
ATP6V1H
ARSA
TPT1
SCGN
F13A1
IGHV35aa
CSPG4
ACOT8
DPYSL3
AK3
PDK1
TUFM
DAP3
DYNC1I2
SVIL
IDH3G
SORT1
CAT
SLC22A2
RBPMS
DLST
DDX23

## Sheet: Sheet2
Gene names
UMOD
CALB1
FABP1
GSTA2
PCK1
MME
ALDOB
KHK
DMGDH
COL14A1
DPEP1
ASPN
ENPEP
DDC
ADH1B
HSD11B2
CFHR5
ABAT
CUBN
DES
PAH
BHMT
VIL1
ADH6
SPTBN2
GK
SFXN2
ASS1
PDLIM2
CAPS
HMGCS2
PODXL
OGN
CFHR1
FLT1
UGT2B15
ATP6V1B1
NAT8
GGT5
C9
MGAM
CA4
CDH16
BHMT2
UGT2B7
SLC4A4
SARDH
SNCG
C6
PC
SMIM24
SLC9A3R2
AGMAT
QPRT
APCS
ACSM2B
AFAP1L2
COL4A3
PKLR
PBLD
CKMT2
ASPA
SUSD2
ECHDC2
CYP4A11
SLC12A1
FREM2
MFGE8
HAO2
GGACT
CDH1
WFDC2
SYNPO
PCK2
TGFB1I1
OAT
CGNL1
VWA1
COL4A1
PTGDS
SLC3A2
PALM3
TNS2
ALDH1A2
IGJ
COL15A1
GGH
PLVAP
SLC22A6
SFRP1
LTBP1
F13A1
LAMB2
SLC5A12
HSPA12A
ECHDC3
GPT
MYL9
SERPINA5
C5
DCXR
NPNT
CCBL2
MMRN2
SLC27A2
SYNPO2
ACSF2
PIPOX
ITGA1
BGN
MRC1
C8A
BCAM
OLFML3
AMBP
ALDH6A1
ACADSB
ACY3
CPQ
PVALB
ACY1
ACE
DPT
HDHD3
NTN4
FGL2
TUBA4A
COL4A2
PRKCDBP
CLIC5
MSRA
XPNPEP2
FBLIM1
AOC3
ALDH4A1
FRAS1
HSPA2
CFHR2
MATN2
SMTN
ARPC1A
NES
PEPD
GPX3
SDC1
MIOX
AK4
OLFML1
COL6A3
PDLIM7
CFL2
NEGR1
PRODH2
EPHX2
SORD
SELENBP1
GATM
COL6A2
MYH11
PARVA
CSRP1
NDUFB11
ADH1C
MRPL55
ARHGEF17
LDB3
CMBL
C7
GCDH
PHGDH
COL4A4
ANK2
GSTM2
NID1
FBP1
L1CAM
CDH13
ANG
ALDH1B1
F9
CBR4
AASS
ALDH7A1
RENBP
FAM169A
PLGRKT
C8B
ADCK3
HADH
SLC23A1
BST2
ACSS1
NT5E
BPHL
NDUFA13
ARMC10
GNPDA1
MAOB
FHL3
C8G
FMO1
SLC44A2
PECAM1
ATP1A1
SCRN2
THSD7A
ATP1B1
ALDH5A1
ACOT2
ACAT2
COL6A1
LHPP
RBP4
TNS1
NDUFS5
EFNB1
ACADM
KANK2
NDUFB9
SORBS3
MYO1B
NDUFB8
TMOD1
ACAD8
QDPR
COL18A1
GPRC5C
EFR3A
ECI2
EHD4
C11orf54
SYNPO2
NDUFB7
CSRP2
L3HYPDH
ACSL1
MTHFS
MRC2
S100A2
ARHGAP35
MYLK
PBX1
PPCS
LIMS2
RAPH1
CDH11
GLUD2
APOH
S100A1
ISOC1
DAK
HABP4
38231
ILK
DDAH1
NDUFS4
NDUFB1
CHP1
CFHR3
ALAD
CD81
NDUFV2
MTCH1
SERPINB6
NDUFV1
UQCRC2
PALLD
NRIP2
IVD
ARMC1
IDH1
FECH
ISOC2
GRHPR
LAMA5
CYB5R1
NAPRT
EFHD1
THNSL1
EHD3
CNN2
DDT
NDUFA5
ALDH9A1
ACO1
ATP6V1H
HSPG2
PLCG2
RAB3IL1
NDUFA9
PTGR1
FAM177A1
CFB
CRAT
VCL
ECHDC1
SUCLG2
FLNA
LETM1
ATP6V1F
ATP6V1E1
HINT2
NDRG2
PLS3
KNG1
GAMT
NDUFS1
ADD3
HNMT
AK3
FKBP2
PARK7
TNS3
ACTN4
MYH10
SUCLA2
NDUFA4
NENF
HEBP2
ADH5
EPS15L1
TLN1
FAM134A
EEF2
TPR
NAA10
KIF5B
KLC1
PDIA4
PABPC1
G3BP1
EIF4G1
HSP90AA1
PA2G4
TPD52L2
PFN1
RPN1
SF3A3
DUSP3
EXOSC7
DAZAP1
RICTOR
PNN
ARHGEF7
GCN1L1
GRB2
SRRM2
SKP1
LRRC59
NME1-NME2
CHORDC1
USP14
40057
NSUN2
PSAP
GMPS
LUC7L2
THRAP3
CBX3
PABPC4
HDGF
NAE1
SH3BGRL3
RUVBL2
RANBP3
ARHGDIB
GOLGB1
UBE2I
TMEM263
RPL17
SNRPA
NHP2L1
OTUD4
TRIM25
DNAJC9
BUB3
C12orf10
RCN1
SUPT5H
NELFA
THUMPD1
C19orf43
DLGAP4
PRPF3
SNRPD1
SRSF9
RBM17
LGALS3
LRRFIP1
SLTM
AGPS
ACBD3
RPS16
EIF5B
AKAP13
ARL8B
GLRX3
GOLGA3
RBPMS
PMM2
HSPH1
SART3
HN1L
PFKP
DST
DDX23
MCM4
PPP1R9B
ZNF830
SRPR
TIGAR
CSTF3
P4HB
FEN1
CDV3
RBX1
STK26
PPM1G
CNBP
PES1
RPL5
NUDCD3
PVR
NOP58
DDX18
GNL3
RBM28
RBM25
NEMF
HSD17B11
DIDO1
MARCKSL1
PDCD11
MEPCE
IGF2R
WNK1
NUP62
SNRPA1
PTPN6
DIABLO
PSMD3
KLC2
EGLN1
TLE3
TYMP
GCC1
LARP7
GAA
FAM192A
XRCC4
NELFE
PFAS
RANBP10
RAD50
FAM114A1
NAMPT
ANXA1
WBP2
DTX3L
ZMYND8
PRKCB
PPID
ABCF2
ELAC2
DDX21
DCDC2
AMACR
BID
FBL
DDX27
DHX16
CEP170B
NOP2
RNF213
LLPH
TCOF1
RBM8A
NOL3
TNIK
UBAP2
LIG3
NXF1
DDX10
TMEM102
HMGA1
DSG2
RBM3
TXLNA
MSH2
YBX3
FIP1L1
RCC1
ARRB2
ZC3H18
PRPF6
SMARCA1
LYAR
ZRANB2
TES
C8orf33
RNF20
CASC4
SSH2
OGFR
BYSL
PTPN1
ERO1L
POP1
C17orf59
DNM1
GCC2
PARP4
S100A9
GTF2F1
TUBB4A
SH3PXD2B
NASP
RFX5
HIST1H1B
NOP16
ZHX2
MNDA
PIK3AP1
GATAD2A
DIS3L2
CPOX
NBN
MGEA5
MICU2
PTPRK
BACH1
FAM129A
ANAPC7
RECQL
KIF21A
OVCA2
SSH3
HNF1B
SULF2
LRRK2
CWC27
CEP170
GOLM1
ISY1
S100A8
KRT19
HMGN1
C7orf50
HN1
FAM84B
DDX47
ITGB8
RAB11FIP1
DYNLT1
RAB32
NCEH1
IL4I1
MID1
LSP1
NNMT
TRAM1
ITGB2
STK39
MYO5A
DCTPP1
RAC2
ANKS1A
APOBR
CCDC94
THBS2
HMGB3
SRPK1
ITGAM
TUBB3
MYBBP1A
DPP9
SMARCD1
NCF2
SLC34A2
CLIC6
S100A12
RTFDC1
PLOD2
BICC1
PLIN2
MPO
GPNMB
SLC4A2
AHNAK2

## Sheet: Sheet3
Gene names
ATP6V0A4
ATP6V0D2
GPNMB
PLCG2
CKMT1A
CKMT2
IL18
KIF21A
GLTP
PVALB
MMP24OS
ATP6AP1
RHCG
GYG1
KIF13B
MAP1B
MYH14
LGALS3
ARL8B
SPARCL1
SCIN
LIMA1
EPDR1
NAMPT
DHRS7
EPS8
UPP1
CPOX
BPGM
TFRC
SORL1
DSG2
TANGO2
TBC1D24
SNTB1
FKBP1A
ME3
MUC1
STIM1
SH3GLB2
PRKCD
PLBD1
FYCO1
CD9
CKB
CORO7-PAM16
IDH3G
LAMP2
CEND1
DNASE2
HPRT1
PTS
SCRN1
DSP
VPS13C
PRKAA1
CLIP1
OXR1
PGP
UBA6
PYGB
RAB2A
DIAPH1
SCARB2
KRT18
LIMCH1
HSPH1
SLC4A1
NDUFAF4
CYCS
AGL
FAM63A
RAB9A
CTSD
TES
ATP5S
ABHD11
PCDH1
AHSA1
ATP6V1C2
PRKAR1A
FTH1
PLBD2
AGA
HIST1H1B
GOLM1
TOM1
SPTBN2
MAN2B1
ALG2
HEXB
DBN1
PKM
FBXO2
FUCA1
NDRG2
PPFIBP2
IDH3A
ERO1L
ENPP4
HCCS
GPD2
NDUFAF3
ANK1
MAP2K1
GPD1L
ENDOD1
HEXA
MAGED2
ALDOA
IDH3B
RAP1GDS1
ARSA
STK39
DPP7
TIMM8A
SYNJ2BP-COX16
CA2
PFKM
MANBA
PRCP
RAP1GAP
ADSS
ALDOC
TMEM263
ATP9A
TWF1
NAGA
PACS1
RAP2B
YARS
GSTZ1
MAP1LC3A
PHKB
FAM3C
CPT1B
CARS
PLLP
MAN2C1
ALCAM
GBAS
SSBP1
MANF
BOLA2
MGLL
ASAH1
EPB42
RAB14
PRKAB1
MKKS
RAB11B
GPI
PAFAH1B2
ACSS3
LPCAT3
STAP1
ST14
CAPG
HSPA4L
LAMTOR2
CAPNS1
ITPA
S100A11
CAPN1
ARL6IP5
GFER
RHOG
GNA11
SRI
TIMMDC1
USP7
LAMP1
LDHA
HINT3
EML2
SDC4
ATG3
CDH1
RALA
RAB7A
VAC14
NNT
TRIM2
TTC1
RALGAPA2
LAMTOR3
C9orf142
NAP1L4
NAPA
MOB1A
HSPB1
TOMM40
RDH14
BCAT2
PRKAG2
PSAP
MCTS1
BAG1
TSG101
MIF
GARS
MAP2
CAPN2
TCOF1
NT5DC1
CS
RAB1B
ISCU
AMPD3
G6PD
UBXN6
DPP3
GSPT1
RAB6A
NAPG
PDHX
TMED4
DLAT
RAD23A
ATP6V1B1
PSME2
VDAC1
PSMD10
CAPRIN1
WDR1
USP14
GDI1
PRDX5
DNM1L
FAM129B
VTI1B
UBA5
MTPN
DNAJB1
BDH1
CHMP4A
APMAP
SLC25A5
NUBP1
STIP1
PSME1
UBA2
SH3BGRL
LYPLA1
SLC25A3
PTGR2
MECR
SGTA
TMEM189-UBE2V1
LARS2
HSBP1
MVP
RAB21
USO1
DNAJA3
ATP6V1H
TOLLIP
DHCR7
ATP6V1A
AK1
ACSL1
CUL5
AHCYL2
SLC25A12
TATDN1
TIMM44
SLC25A4
PRDX2
GMPPB
HK1
IPO7
NUTF2
SEC24B
VDAC3
GRSF1
PITPNB
HSPA9
TFG
KCTD12
OGDHL
PTGES2
AKR1B1
HCFC1
TSFM
MPP7
GLRX5
GPX1
IQGAP1
GLB1
BANF1
AFG3L2
APRT
RALY
ARHGAP18
NDRG1
GOT1
APEH
GOT2
ATP6V1D
PLS3
PPIA
PDP1
PRKAG1
UBE2I
SERPINB1
HSD17B4
SEC23B
ATP6V1E1
UBE2L3
PDCD6IP
ME2
ACSS1
RHOA
UBE2M
MAPRE1
GAPDH
RANBP3
RAD23B
NME1-NME2
MDH2
PPA2
RAN
ATP6V1F
TEX264
CYB5B
UBE2N
OGDH
FKBP4
TPD52L2
KTN1
DDB1
PSMA3
IPO5
ARF4
MYH9
PIP4K2C
CYC1
NSFL1C
GNB2
PA2G4
CFL1
TMED10
UBE2K
SNRPD2
SYPL1
PSMB3
HSP90AA1
PGK1
PTBP3
EPCAM
HNRNPUL2
PSMA4
COPE
FLNB
OTUB1
COPB2
VAPA
EIF2S3
PSMB4
LONP1
ARHGAP1
RPS26
RPS20
PDHB
EEF2
EIF3I
VCP
PFDN2
PHB2
RARS
TPI1
HNRNPA1
UBC
FIS1
AARS
DBNL
HSPA4
TCEB2
PSMD2
RPS19
PSMA1
RPS18
PSMD1
CAND1
EIF4A1
PSMC2
RPS3
RPSA
USP5
CCT6A
HINT1
ERP29
ACTR1A
EEF1B2
SEPT7
CLTC
MPI
HSP90B1
CTNNA1
CANX
GNB1
EEFSEC
NUCB1
LRPPRC
ATP5L
EEF1A1
ARPC5
TSN
XRCC6
RAB5C
ZADH2
SEPT2
COX5B
ATP1A1
HYOU1
SDHA
P4HB
XRCC5
ACTN4
S100A16
LMNA
DDOST
HNRNPA3
NDUFS3
ATP5J2
TUBB2B
TMOD3
SELENBP1
LACTB
MRPS35
NCL
PPAP2B
NDUFS2
AIFM1
MTCH2
ATIC
ATP5F1
SDHB
LYPLAL1
TAGLN2
ENO1
TJP1
TLN1
PGRMC1
ATP5H
SEPT11
AK2
USMG5
ABHD14B
GLOD4
MYO7B
SLCO4C1
PLXNB2
VCL
YBX1
COMMD9
PRDX1
AP2A1
RAB29
PPT1
NDUFB10
TPM1
PDIA4
NID1
SNX9
ABLIM1
COA4
TXN
NDUFA13
RAB11FIP5
CRK
NUDT5
LACTB2
PGPEP1
SLC25A13
CLIC1
PEBP1
HSPG2
GALT
NDUFA11
NDUFS7
HAGH
AP2B1
SLC13A2
GFPT1
C2orf47
NDUFA4
TTR
SUCLG2
DBT
RRAS2
BLMH
DDAH2
SNX27
HS1BP3
BPNT1
CTSS
TP53I3
PPP1R7
UGGT1
MYO1C
COASY
APOD
PCCB
OSBPL8
NID2
MAT2A
SPRYD4
TRIP6
MT-CO2
CTH
SLC22A12
SOD1
CDH6
BDH2
MTTP
ITGB1
TXNDC5
SUCLG1
PCCA
HSD17B8
TMEM205
MYO6
MT-CO3
SFXN1
NIPSNAP1
SLC47A1
LGMN
AFMID
ACO1
ASNA1
CLIC5
VARS
PAPLN
ACAD8
FMO4
FHL2
LMCD1
PTGR1
TSTD1
ANXA6
SDHC
ACADVL
EZR
MTX1
MRPS23
ENOSF1
SERPINB6
PSPH
ADCK3
SRSF3
LRPAP1
GLUD1
CLTB
APCS
ANK3
MRPS14
CPT2
IYD
PTER
EPB41L2
C21orf33
CORO1C
PDIA6
MAT2B
TFAM
C1orf123
ITGA6
CSRP2
PHYH
SUGT1
MUT
SLC25A20
AZGP1
MCCC2
MT-CO1
CBR4
TRPV1
TINAGL1
PDLIM7
D2HGDH
SLC5A1
SYCE2
AHCY
ACAT2
SUCLA2
ERLIN2
SSR4
CYB5R1
RDX
FHIT
ACSF3
FAM213A
PRDX3
ADD1
SDPR
CMPK1
POR
ALDH9A1
FHL1
LAMA5
MT-ND5
NDUFB5
CDHR5
RGN
SCPEP1
HADH
APOH
COL1A1
SLC37A4
ST20-MTHFS
CST3
FLNA
DARS2
CNDP2
ACOT13
MT-ND1
PIGR
ACOT7
AMT
NDUFB7
MCEE
PFKL
PALM
PALM3
LASP1
PROSC
CASK
GLS
GALE
PEPD
RBBP9
ASL
MAOA
GM2A
METTL7B
HDGF
TPM4
AGRN
CTSH
RNPEP
ILK
GRHPR
EML4
MSN
CTSZ
EHD3
NDUFV2
PDLIM1
SLC22A2
CACYBP
HMGCL
ANP32E
CYP27A1
NDUFS1
EPS8L2
RRAS
TGFB1I1
ECH1
NDUFA9
LPP
MTHFD1
ATP6V1B2
NDUFC2
GCHFR
SCP2
BAIAP2
ABCD3
SFXN3
SLC22A6
RBKS
PLEKHA5
RSU1
CSRP1
SLC13A3
SEPHS2
SYNPO
PNPO
DECR2
NDUFB1
HSD17B10
AKR7A2
CDHR2
SUMF2
AGPAT3
PNP
ECI2
FARP1
SERPINA5
TST
ALDH5A1
PHYHD1
DHRS1
LDHD
THNSL1
SLC23A1
SDSL
LAMB2
SLC7A8
AIF1L
QDPR
ALAD
SCLY
COX7A2L
SUOX
PARVA
DPYSL2
PECR
CYP4F2
SLC5A10
UPB1
NIT1
ACMSD
BASP1
TNXB
ALDH7A1
EHD4
LAD1
COX6C
MPST
CARHSP1
NDUFB4
APOA4
NDUFB3
HNMT
C14orf2
ATPIF1
NAPRT
COX7A2
COL1A2
ACTA2
CRIP2
ACAA2
PLS1
NIT2
SORBS3
PCYOX1
CFHR1
EPHX2
IDH1
MARC2
ALDH1L1
NDUFA3
F9
NDUFS6
APOC3
DHTKD1
KRT19
GSTM2
HSPB6
DCXR
CYB5A
UCHL1
ACSM3
SLC36A2
THY1
TAGLN
CRYZ
LGALS2
MCCC1
NDUFB9
CNP
SLC12A1
ACE2
HDHD3
SUSD2
CNN1
UGT2A3
NDUFA10
SORBS2
MYH10
ITGA1
FERMT2
SLC9A3R2
NDUFA12
B4DLN1
SLC3A1
NDUFB8
CRIP1
CRYAA
NDUFA7
RNASE2
NPL
RNASE6
ADD3
NDUFS4
COL18A1
ACLY
SCRN2
DDAH1
CFD
COL4A2
LHPP
ECHS1
AMBP
SOD3
DHRS4
AMACR
ACOX2
DNPH1
TPMT
BIN1
CDH2
NDUFV1
GPT
MYL9
EMILIN1
AASS
PTGDS
SMIM24
MYLK
ASRGL1
NDUFV3
TTC38
COL4A1
SDC1
EHD1
FAM151A
RNASET2
ALDH1B1
SLC9A3R1
NAPSA
ATP6V0A1
SUGCT
ACAD11
EPB41L3
HAO2
OGN
CALD1
KMO
AKR1A1
ALDH6A1
NDUFA2
AMN
CALML3
DAO
OCIAD2
COL14A1
ALDH8A1
TMEM27
NQO2
OAT
SORD
DCN
NES
GALK1
ACOX1
AOX1
ASPN
PRODH2
ACAA1
C11orf54
HSPA12A
CES2
GALM
ECHDC2
ASPDH
HIBCH
ENTPD5
NAT8
SLC6A19
GAMT
GGT5
XPNPEP2
RBP4
GLYATL1
HAAO
PODXL
HRSP12
PIPOX
GK
ADH1B
ECHDC1
SLC5A12
SLC3A2
FECH
RBP5
ACADM
GLDC
TPM2
AKAP12
ADIRF
SLC22A8
UGDH
SLC5A2
TNS1
EPHX1
ASPA
HGD
GIPC2
ACADSB
ADH6
CRYL1
CYP4A11
BHMT2
SFXN2
ECHDC3
CMBL
COTL1
SLC27A2
AKR7A3
AOC3
CRYM
LYZ
ACE
SHMT2
MIOX
AQP1
SARDH
GDA
ALDH2
ACY3
FBP1
GSTM3
PDLIM2
FMO1
MSRA
AOC1
PAH
UMOD
AGXT2
MGAM
PHGDH
ENPEP
GPX3
QPRT
GGACT
BBOX1
DPP4
PKLR
PDZK1IP1
TINAG
AKR1C3
UGT1A9
HPD
PSAT1
VIL1
DAB2
ACY1
DAK
SLC4A4
ACSM2A
DDC
ALDH3A2
CHDH
MAOB
GGH
GGT1
HOGA1
FTCD
UGT2B7
EHHADH
BPHL
DPYS
ACSF2
CUBN
PCK1
KHK
DMGDH
AK4
CLIC4
ALDH4A1
PC
MME
PBLD
FABP1
GSTA1
SHMT1
GPD1
GLYAT
LRP2
ASS1
ABAT
CALB1
PDZK1
AGMAT
DPEP1
ANPEP
ACSM2B
BHMT
GATM
ALDOB
PCK2

## Sheet: Sheet4
Common genes	Hub genes	Candidated genes
PRODH2	NDUFS1	NDUFS1
GATM	ATP6V1F	PAH
ALDH6A1	NDUFA13	PC
ABAT	ATP6V1H	HAO2
UMOD	NDUFA9	ALDH4A1
FABP1	ATP6V1E1	SARDH
ALDOB	NDUFB8	ACSL1
AGMAT	NDUFV2	PIPOX
ECHDC2	NDUFS4	ACADM
SFXN2	NDUFB9	ECHDC1
SLC5A12	PAH	LAMB2
ASS1	PC	EPHX2
ALDH4A1	HAO2	GATM
FBP1	ALDH4A1	TLN1
PCK2	NDUFA4	ASS1
GPNMB	HADH	PCK2
PIPOX	ALDH7A1	PCK1
ACSM2B	FBP1	DDC
SLC23A1	SARDH	ALDOB
NDUFS4	ALDH6A1	FABP1
NDUFA4	ACSL1	NID1
ADH6	PIPOX	SLC27A2
NDUFB9	ACADM	ACSS1
NDUFB8	ECHDC1	COL4A1
ACADSB	LAMB2
UGT2B7	SUCLA2
GGACT	EPHX2
AASS	GATM
ACY1	TLN1
SLC12A1	DCXR
ATP1A1	SDC1
ACADM	ASS1
HADH	ACY1
MSRA	ABAT
FMO1	NDUFB7
GPX3	ATP6V1B1
GK	QDPR
DMGDH	PCK2
EPHX2	PRODH2
CALB1	PCK1
SUCLG2	DDC
ADH1B	AASS
NDUFA9	ALDOB
MGAM	FABP1
CMBL	DMGDH
PBLD	NID1
BPHL	SLC27A2
HDHD3	ACSS1
SLC4A4	MYL9
TLN1	SORD
ECI2	COL4A1
SARDH	ASPA
DCXR
CBR4
OGN
HIST1H1B
GGH
NDUFV2
ACE
QDPR
PCK1
THNSL1
NAT8
DDC
SORD
LGALS3
AK4
ACO1
SLC22A6
ECHDC3
DPEP1
ATP6V1B1
PAH
HAO2
NDUFS1
RBP4
COL4A1
ALDH7A1
SDC1
NDUFA13
ACAD8
FECH
C11orf54
PLS3
PTGDS
ADCK3
NDUFB7
NID1
SUCLA2
PHGDH
SERPINA5
ATP6V1E1
XPNPEP2
ACSL1
ECHDC1
MYL9
ACSS1
CYB5R1
CDH1
APCS
PODXL
SMIM24
PC
ASPA
LAMB2
DSG2
SLC27A2
VIL1
ATP6V1F
ATP6V1H
